# Supplementary material for: Local and Distant Recurrence in Resected Sacral Chordomas: A Systematic Review and Pooled Cohort Analysis
Source: PubMed Central journal article supplement — Global Spine J. 2018 May 30;9(2):191–201. doi: 10.1177/2192568217741114 (PMC6448196; doi:10.1177/2192568217741114), 2018-05-30
Supplement: GSJ741114_suppl_mat.pdf [file GSJ741114_suppl_mat.pdf]

---

**Supplementary Table S1. Search Terms**

---

Pubmed: 442 results

("Chordoma"[Mesh] OR "chordoma"[tw] OR "chordomas"[tw] OR "chorda"[tw] OR "chordosarcoma"[tw])  
AND ("Sacrum"[Mesh] OR "sacrum"[tw] OR "sacrum's"[tw] OR "sacral"[tw]) AND ("General Surgery"[Mesh]  
OR "Surgical Procedures, Operative"[Mesh] OR "surgery"[Subheading] OR "surgery"[tw] OR "surgeries"[tw]  
OR "surgical"[tw] OR "operative"[tw] OR "operation"[tw] OR "operations"[tw] OR "resection"[tw] OR

---

Embase: 525 results

('chordoma'/exp OR "chordoma":ab,ti OR "chordomas":ab,ti OR "chorda":ab,ti OR "chordosarcoma":ab,ti)  
AND ('sacrum'/exp OR "sacrum":ab,ti OR "sacrum's":ab,ti OR "sacral":ab,ti) AND ('surgery'/exp OR  
"surgery":ab,ti OR "surgeries":ab,ti OR "surgical":ab,ti OR "operative":ab,ti OR "operation":ab,ti OR

---

CINAHL: 56 results

("chordoma" OR "chordomas" OR "chorda" OR "chordosarcoma") AND (MH "Sacrum" OR "sacrum" OR  
"sacrum's" OR "sacral") AND (MH "Surgery, Operative+" OR "surgery" OR "surgeries" OR "surgical" OR

---

Web of Science: 327 results

TS=("Chordoma" OR "chordomas" OR "chorda" OR "chordosarcoma") AND ("Sacrum" OR "sacrum's" OR  
"sacral") AND ("General Surgery" OR "Surgical Procedures, Operative" OR "surgery" OR "surgeries" OR

---

Cochrane: 1 result

"Chordoma"[Mesh] OR "chordoma" OR "chordomas" OR "chorda" OR "chordosarcoma" AND  
"Sacrum"[Mesh] OR "sacrum" OR "sacrum's" OR "sacral" AND "General Surgery"[Mesh] OR "Surgical  
Procedures, Operative"[Mesh] OR "surgery" OR "surgeries" OR "surgical" OR "operative" OR "operation"

---

**Supplementary Table S2. Included Studies and Primary Outcomes**

| Authors                                          | Year | Primary Institution(s) Affiliated with Treatment                                                   | Date Range of Patient Presentation | Number of Subjects Included in Review | Number of Local Rec. (%) | Number of Distant Rec. (%) | Mean Time to Local Rec. (months) | Mean Time to Distant Rec. (months) |
|--------------------------------------------------|------|----------------------------------------------------------------------------------------------------|------------------------------------|---------------------------------------|--------------------------|----------------------------|----------------------------------|------------------------------------|
| Aguiar Junior et al. <sup>34</sup>               | 2014 | A. C. Camargo Cancer Center, São Paulo, Brazil                                                     | 1980-2006                          | 16                                    | 9 (56)                   | 3 (19)                     | -                                | -                                  |
| Ahmed, A.R. <sup>35</sup>                        | 2009 | Alexandria University, Alexandria, Egypt                                                           | 1981-2005                          | 17                                    | 6 (35)                   | 5 (29)                     | 40                               | 51                                 |
| Ahmed, R et al. <sup>72</sup>                    | 2015 | University of Iowa, Iowa City, USA                                                                 | 1978-2010                          | 7                                     | 5 (71)                   | -                          | 12                               | -                                  |
| Angelini, A. et al. <sup>16</sup>                | 2015 | University of Bologna, Bologna, Italy                                                              | 1976-2011                          | 71                                    | 32 (45)                  | 23 (32)                    | 46                               | 65                                 |
| Arikan, M. et al. <sup>73</sup>                  | 2014 | Oncology Training and Research Hospital, Ankara, Turkey                                            | 1991-2003                          | 10                                    | 4 (40)                   | 0                          | -                                | -                                  |
| Asavamongkolkul, A and S. Waikakul <sup>36</sup> | 2012 | Mahidol University, Bangkok, Thailand                                                              | 1990-2002                          | 21                                    | 3 (14)                   | 3 (14)                     | 52                               | 84                                 |
| Atalar, H. et al. <sup>37</sup>                  | 2006 | Faith University, Ankara, Turkey                                                                   | 1986-2005                          | 8                                     | 5 (63)                   | 3 (38)                     | 19                               | 38                                 |
| Bergh et al. <sup>22</sup>                       | 2000 | Sahlgrenska University Hospital, Goteborg, Sweden                                                  | 1968-1998                          | 30                                    | 12 (40)                  | 9 (30)                     | 71                               | 74                                 |
| Bohm et al. <sup>31</sup>                        | 1993 | Cleveland Clinic, Cleveland, USA                                                                   | 1980-1992                          | 4                                     | 3 (75)                   | -                          | 37                               | -                                  |
| Chandavarkar <sup>7</sup>                        | 1996 | Tata Memorial Hospital, Bombay, India                                                              | 1941-1991                          | 50                                    | 20 (40)                  | -                          | -                                | -                                  |
| Chen et al. <sup>38</sup>                        | 2010 | The First Affiliated Hospital of Soochow University, Suzhou, Jiangsu, China                        | 1992-2007                          | 36                                    | 16 (44)                  | -                          | 30                               | -                                  |
| Chung Rong et al. <sup>39</sup>                  | 1996 | Chang Gung Memorial Hospital, Taipei, Taiwan                                                       | 1978-1993                          | 7                                     | 5 (71)                   | -                          | -                                | -                                  |
| Clarke et al. <sup>40</sup>                      | 2012 | Johns Hopkins Hospital, Baltimore, USA                                                             | 2004-2009                          | 30                                    | 6 (20)                   | 1 (3)                      | -                                | -                                  |
| Dhawale et al. <sup>69</sup>                     | 2014 | University of Miami Miller School of Medicine, Miami, USA                                          | 1985-2010                          | 21                                    | 8 (38)                   | 4 (19)                     | 30                               | -                                  |
| Dubory et al. <sup>24</sup>                      | 2015 | Bicêtre University Hospital, Paris, France                                                         | 1985-2010                          | 22                                    | 8 (36)                   | 3 (14)                     | 86                               | 104                                |
| Eid et al. <sup>41</sup>                         | 2011 | Korea Cancer Center Hospital, Seoul, South Korea                                                   | 1993-2008                          | 12                                    | 7 (58)                   | 3 (25)                     | 28                               | -                                  |
| Froehlich et al. <sup>42</sup>                   | 2012 | Medical University of Graz, Graz, Austria; National Centre for Spinal Disorders, Budapest, Hungary | 1985-2010                          | 19                                    | 11 (58)                  | 1 (5)                      | 22                               | -                                  |
| Fuchs et al. <sup>25</sup>                       | 2005 | Mayo Clinic, Rochester, USA                                                                        | 1980-2001                          | 52                                    | 23 (44)                  | -                          | -                                | -                                  |
| Furlani et al. <sup>32</sup>                     | 1980 | University of Padova, Padua, Italy                                                                 | 1967-1976                          | 4                                     | 3 (75)                   | 1 (25)                     | 22                               | -                                  |
| Garafalo et al. <sup>74</sup>                    | 2014 | University Hospital of Lausanne, Lausanne, Switzerland                                             | 2001-2011                          | 7                                     | 4 (57)                   | 1 (14)                     | -                                | 18                                 |
| Housari and Gonzalez <sup>23</sup>               | 2013 | Hospital Universitario Ramo'n y Cajal, Madrid, Spain                                               | 1988-2009                          | 13                                    | 9 (69)                   | 5 (39)                     | -                                | -                                  |
| Huth et al. <sup>75</sup>                        | 1984 | UCLA School of Medicine, Los Angeles, USA                                                          | -                                  | 4                                     | 1 (25)                   | -                          | 8                                | -                                  |

**Supplementary Table S2. Included Studies and Primary Outcomes (part 2)**

| Authors                               | Year | Primary Institution(s) Affiliated with Treatment                                                          | Date Range of Patient Presentation | Number of Subjects Included in Review | Number of Local Recurrences | Number of Distant Recurrences | Mean Time to Local Rec. (months) | Mean Time to Distant Rec. (months) |
|---------------------------------------|------|-----------------------------------------------------------------------------------------------------------|------------------------------------|---------------------------------------|-----------------------------|-------------------------------|----------------------------------|------------------------------------|
| Ishii et al. <sup>76</sup>            | 2002 | Keio University, Tokyo, Japan                                                                             | 1987-2002                          | 4                                     | 4 (100)                     | 1 (25)                        | 61                               | -                                  |
| Jao et al. <sup>77</sup>              | 1985 | Mayo Clinic, Rochester, USA                                                                               | 1960-1979                          | 16                                    | 7 (44)                      | 4 (25)                        | -                                | -                                  |
| Ji et al. <sup>18</sup>               | 2016 | Peking University, Beijing, China                                                                         | 2003-2012                          | 115                                   | 53 (46)                     | 20 (17)                       | 42                               | -                                  |
| Kayani et al. <sup>19</sup>           | 2015 | The Royal National Orthopaedic Hospital, Stanmore, United Kingdom                                         | 1999-2013                          | 58                                    | 32 (55)                     | 19 (33)                       | -                                | -                                  |
| Li et al. <sup>33</sup>               | 2013 | China-Japan Union Hospital of Jilin University, Jilin, China                                              | 1999-2010                          | 36                                    | 19 (53)                     | -                             | -                                | -                                  |
| Localio et al. <sup>55</sup>          | 1980 | New York University Medical Center, New York City, USA                                                    | 1964-1979                          | 8                                     | 1 (13)                      | -                             | 60                               | -                                  |
| Makhdoomi et al. <sup>27</sup>        | 2012 | Sher-i-Kashmir Institute of Medical Sciences, Kashmir, India                                              | 2006-2011                          | 14                                    | 1 (7)                       | -                             | 48                               | -                                  |
| Moojen et al. <sup>44</sup>           | 2011 | Leiden University Medical Center, Leiden, Netherlands                                                     | 1981-2003                          | 15                                    | 12 (80)                     | 4 (27)                        | -                                | 120                                |
| Nishida et al. <sup>14</sup>          | 2011 | Nagoya University Hospital, Nagoya Memorial Hospital, Aichi Cancer Center Central Hospital, Nagoya, Japan | 1990-2007                          | 10                                    | 3 (30)                      | 2 (20)                        | -                                | -                                  |
| Osaka et al. <sup>45</sup>            | 2014 | Nihon University School of Medicine, Tokyo, Japan                                                         | 1981-2013                          | 16                                    | 4 (25)                      | 3 (19)                        | 42                               | -                                  |
| Ozaki et al. <sup>46</sup>            | 1997 | Westfälische Wilhelms-University, Munster, Germany                                                        | 1982-1993                          | 11                                    | 6 (55)                      | 2 (18)                        | -                                | 26                                 |
| Ozger et al. <sup>78</sup>            | 2010 | Istanbul University, Istanbul, Turkey                                                                     | 1993-2007                          | 17                                    | 7 (41)                      | 3 (18)                        | 36                               | 40                                 |
| Park et al. <sup>28</sup>             | 2006 | Massachusetts General Hospital, Boston, USA                                                               | 1982-2002                          | 21                                    | 8 (38)                      | 5 (24)                        | 77                               | 71                                 |
| Prabhakaran et al. <sup>47</sup>      | 1998 | Kidwai Memorial Institute of Oncology, Bangalore, India                                                   | 1984-1993                          | 8                                     | 4 (50)                      | 3 (38)                        | 41                               | -                                  |
| Puri et al. <sup>48</sup>             | 2009 | Tata Memorial Hospital, Bombay, India                                                                     | 2000-2005                          | 6                                     | 2 (33)                      | 1 (17)                        | 21                               | -                                  |
| Radaelli et al. <sup>20</sup>         | 2016 | National Cancer Institute, Milan, Italy; Istituto Ortopedico Rizzoli (IOR), Bologna, Italy                | 1981-2012                          | 99                                    | 38 (38)                     | 28 (28)                       | -                                | -                                  |
| Randall et al. <sup>26</sup>          | 2005 | University of Washington Medical Center, Seattle, USA                                                     | 1987-1997                          | 6                                     | 1 (17)                      | 2 (33)                        | -                                | -                                  |
| Ruosi et al. <sup>79</sup>            | 2015 | National Tumour Institute of Naples—Pascale, Naples, Italy                                                | 2000-2013                          | 14                                    | 6 (43)                      | 4 (29)                        | 25                               | 45                                 |
| Sahakitrungruang et al. <sup>80</sup> | 2009 | King Chulalongkorn Memorial Hospital, Bangkok, Thailand                                                   | 2000-2007                          | 6                                     | 0                           | 0                             | -                                | -                                  |

**Supplementary Table S2. Included Studies and Primary Outcomes (part 3)**

| Authors                           | Year | Primary Institution(s) Affiliated with Treatment                                     | Date Range of Patient Presentation | Number of Subjects Included in Review | Number of Local Recurrences | Number of Distant Recurrences | Mean Time to Local Rec. (months) | Mean Time to Distant Rec. (months) |
|-----------------------------------|------|--------------------------------------------------------------------------------------|------------------------------------|---------------------------------------|-----------------------------|-------------------------------|----------------------------------|------------------------------------|
| Schoenthaler et al. <sup>29</sup> | 1993 | University of California San Francisco Medical Center, San Francisco, USA            | 1977-1989                          | 12                                    | 7 (58)                      | 2 (17)                        | -                                | 30                                 |
| Schwab et al. <sup>49</sup>       | 2009 | Sloan Kettering Cancer Center, New York, USA                                         | 1990-2005                          | 42                                    | 17 (40)                     | 13 (31)                       | -                                | -                                  |
| Simpson et al. <sup>81</sup>      | 1995 | Mount Sinai Hospital, University of Toronto, Toronto, Canada                         | 1986-1992                          | 6                                     | 1 (17)                      | -                             | 18                               | -                                  |
| Sundareson et al. <sup>82</sup>   | 1987 | Sloan Kettering Cancer Center, New York, USA                                         | 1978-1985                          | 11                                    | 2 (18)                      | -                             | -                                | -                                  |
| Thieblemont et al. <sup>50</sup>  | 1995 | Centre Leon Berard, Lyon, France; Centre Hospitalier Lyon Sud, Pierre-Bénite, France | 1979-1993                          | 10                                    | 7 (70)                      | 3 (30)                        | 20                               | 59                                 |
| Waisman et al. <sup>51</sup>      | 1997 | Carmel Medical Center, Technion Haifa, Israel                                        | 1987-1993                          | 5                                     | 1 (20)                      | -                             | -                                | -                                  |
| Wong and Kumta <sup>83</sup>      | 2013 | Prince of Wales Hospital, Shatin, Hong Kong                                          | 2006-2009                          | 4                                     | 2 (50)                      | 2 (50)                        | 12                               | 12                                 |
| Wuisman et al. <sup>84</sup>      | 2000 | University Hospital Vrije Universiteit, Amsterdam, Netherlands                       | 1988-1998                          | 4                                     | 2 (50)                      | 2 (50)                        | -                                | -                                  |
| Xie et al. <sup>21</sup>          | 2015 | The Royal Orthopaedic Hospital, Birmingham, United Kingdom                           | 1990-2013                          | 54                                    | 30 (56)                     | 5 (9)                         | 46                               | -                                  |
| Xu et al. <sup>85</sup>           | 1990 | Beijing Ji Shui Tan Hospital, Beijing, China                                         | 1958-1988                          | 41                                    | 6 (15)                      | -                             | -                                | -                                  |
| Xue-Song et al. <sup>52</sup>     | 2010 | Sichuan University, Sichuan, China                                                   | 2004-2008                          | 9                                     | 0                           | 0                             | -                                | -                                  |
| Yang et al. <sup>53</sup>         | 2016 | Beijing Ji Shui Tan Hospital, Beijing, China                                         | 2007-2013                          | 26                                    | 2 (8)                       | -                             | 31                               | -                                  |
| Yonemoto et al. <sup>86</sup>     | 1999 | Chiba Cancer Center, Chiba, Japan                                                    | 1972-1999                          | 13                                    | 6 (46)                      | 6 (46)                        | 24                               | 38                                 |
| York et al. <sup>54</sup>         | 1999 | University of Texas M.D. Anderson, Houston, USA                                      | 1954-1994                          | 27                                    | 18 (67)                     | 6 (22)                        | 28                               | -                                  |
| Zaaroor and Svirij <sup>87</sup>  | 2005 | Israel Institution of Technology, Haifa, Israel                                      | 2000-2004                          | 6                                     | 0                           | -                             | -                                | -                                  |
| Zabel-du Bois <sup>30</sup>       | 2010 | German Cancer Research Center, Heidelberg, Germany                                   | 2000-2009                          | 24                                    | 14 (58)                     | 1 (4)                         | -                                | -                                  |

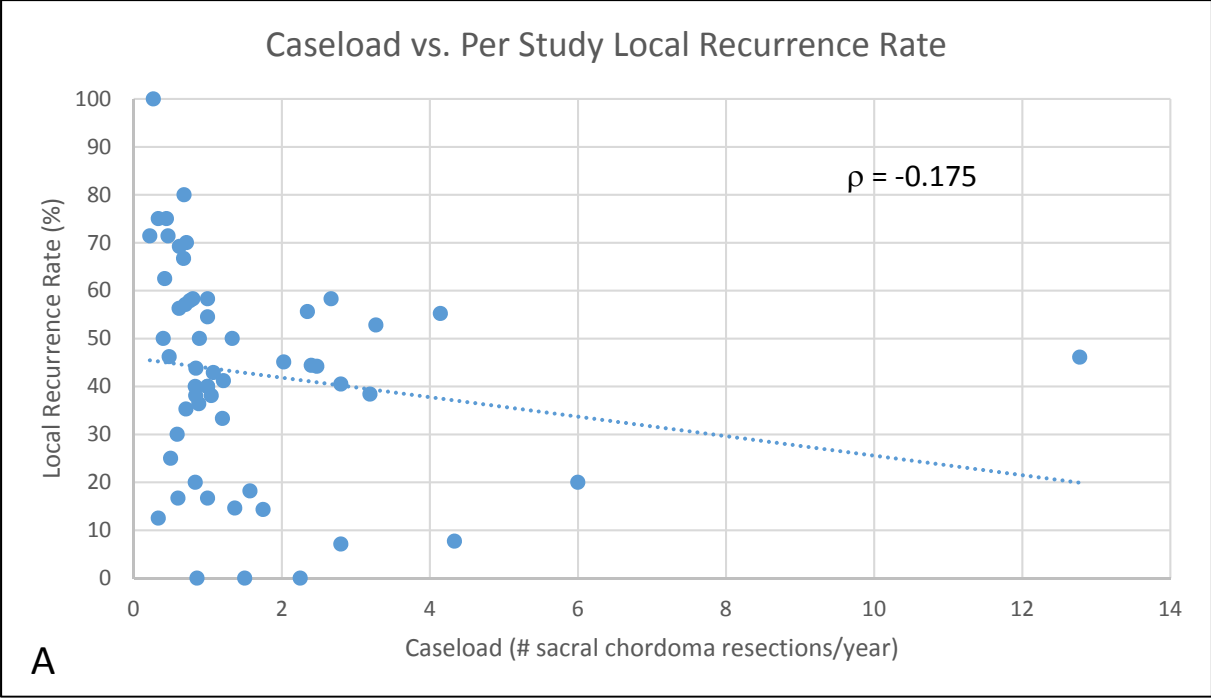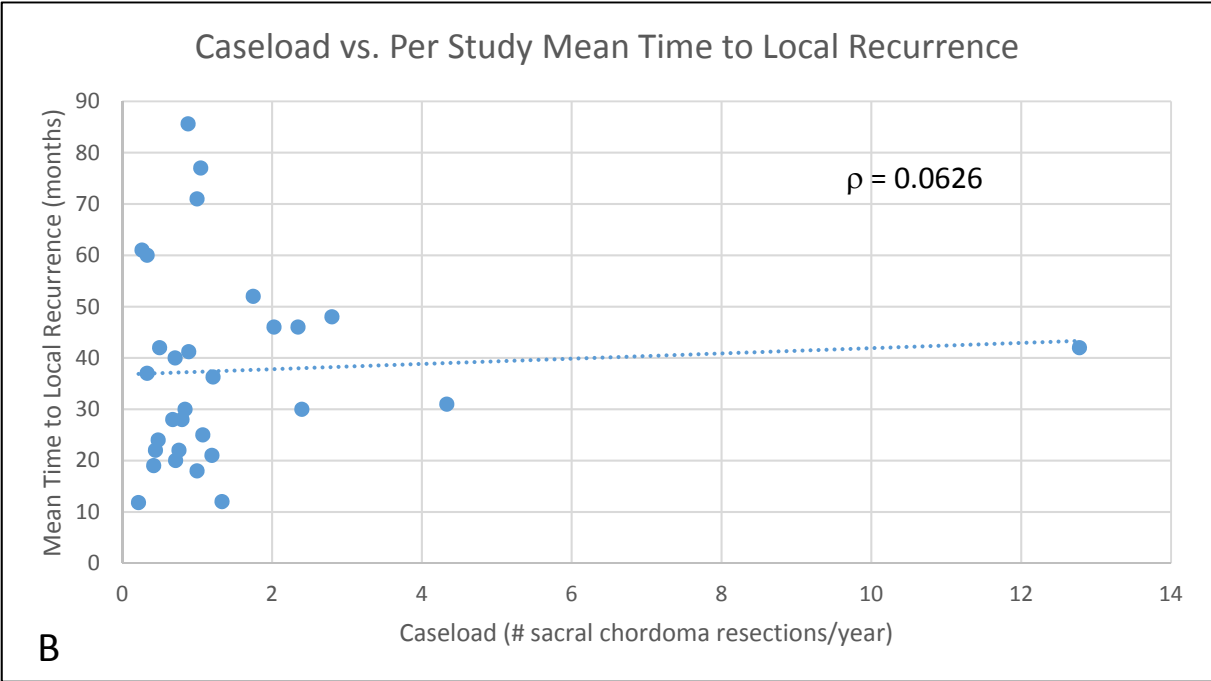

**Supplementary Figure 1:** Correlation between institutional sacral chordoma caseload and local recurrence outcomes. A) Caseload vs. per study local recurrence rate. Pearson correlation coefficient for these two variables was  $\rho = -0.175$ . B) Caseload vs. per study mean time to local recurrence in months. Pearson correlation coefficient for these two variables was  $\rho = 0.0626$ .

## References

1. Gulluoglu S, Turksoy O, Kuskucu A, Ture U, Bayrak OF. The molecular aspects of chordoma. *Neurosurg Rev*. 2016;39(2):185-196; discussion 196. doi:10.1007/s10143-015-0663-x
2. McMaster ML, Goldstein AM, Bromley CM, Ishibe N, Parry DM. Chordoma: incidence and survival patterns in the United States, 1973-1995. *Cancer Causes Control CCC*. 2001;12(1):1-11.
3. Pennicooke B, Laufer I, Sahgal A, et al. Safety and Local Control of Radiation Therapy for Chordoma of the Spine and Sacrum: A Systematic Review. *SPINE*. 2016;41:S186-S192. doi:10.1097/BRS.0000000000001831
4. Sciubba DM, Cheng JJ, Petteys RJ, Weber KL, Frassica DA, Gokaslan ZL. Chordoma of the sacrum and vertebral bodies. *J Am Acad Orthop Surg*. 2009;17(11):708-717.
5. Jawad MU, Scully SP. In brief: classifications in brief: enneking classification: benign and malignant tumors of the musculoskeletal system. *Clin Orthop*. 2010;468(7):2000-2002. doi:10.1007/s11999-010-1315-7
6. Casali PG, Stacchiotti S, Sangalli C, Olmi P, Gronchi A. Chordoma. *Curr Opin Oncol*. 2007;19(4):367-370. doi:10.1097/CCO.0b013e3281214448
7. Chen Y-L, Liebsch N, Kobayashi W, et al. Definitive high-dose photon/proton radiotherapy for unresected mobile spine and sacral chordomas. *Spine*. 2013;38(15):E930-936. doi:10.1097/BRS.0b013e318296e7d7
8. DeLaney TF, Liebsch NJ, Pedlow FX, et al. Long-term results of Phase II study of high dose photon/proton radiotherapy in the management of spine chordomas, chondrosarcomas, and other sarcomas. *J Surg Oncol*. 2014;110(2):115-122. doi:10.1002/jso.23617
9. Holliday EB, Mitra HS, Somerson JS, et al. Postoperative proton therapy for chordomas and chondrosarcomas of the spine: adjuvant versus salvage radiation therapy. *Spine*. 2015;40(8):544-549. doi:10.1097/BRS.0000000000000804
10. Imai R, Kamada T, Tsuji H, et al. Effect of carbon ion radiotherapy for sacral chordoma: results of Phase I-II and Phase II clinical trials. *Int J Radiat Oncol Biol Phys*. 2010;77(5):1470-1476. doi:10.1016/j.ijrobp.2009.06.048
11. Imai R, Kamada T, Sugahara S, Tsuji H, Tsujii H. Carbon ion radiotherapy for sacral chordoma. *Br J Radiol*. 2011;84 Spec No 1:S48-54. doi:10.1259/bjr/13783281
12. Indelicato DJ, Rotondo RL, Begosh-Mayne D, et al. A Prospective Outcomes Study of Proton Therapy for Chordomas and Chondrosarcomas of the Spine. *Int J Radiat Oncol Biol Phys*. 2016;95(1):297-303. doi:10.1016/j.ijrobp.2016.01.057
13. Mima M, Demizu Y, Jin D, et al. Particle therapy using carbon ions or protons as a definitive therapy for patients with primary sacral chordoma. *Br J Radiol*. 2014;87(1033). doi:10.1259/bjr.20130512
14. Nishida Y, Kamada T, Imai R, et al. Clinical outcome of sacral chordoma with carbon ion radiotherapy compared with surgery. *Int J Radiat Oncol Biol Phys*. 2011;79(1):110-116. doi:10.1016/j.ijrobp.2009.10.051
15. Uhl M, Welzel T, Jensen A, et al. Carbon ion beam treatment in patients with primary and recurrent sacrococcygeal chordoma. *Strahlenther Onkol Organ Dtsch Röntgenes Al*. 2015;191(7):597-603. doi:10.1007/s00066-015-0825-3
16. Angelini A, Pala E, Calabrò T, Maraldi M, Ruggieri P. Prognostic factors in surgical resection of sacral chordoma. *J Surg Oncol*. 2015;112(4):344-351. doi:10.1002/jso.23987

17. Chandawarkar RY. Sacrococcygeal chordoma: review of 50 consecutive patients. *World J Surg.* 1996;20(6):717-719.
18. Ji T, Guo W, Yang R, Tang X, Wang Y, Huang L. What Are the Conditional Survival and Functional Outcomes After Surgical Treatment of 115 Patients With Sacral Chordoma? *Clin Orthop.* March 2016. doi:10.1007/s11999-016-4773-8
19. Kayani B, Sewell MD, Tan K-A, et al. Prognostic Factors in the Operative Management of Sacral Chordomas. *World Neurosurg.* 2015;84(5):1354-1361. doi:10.1016/j.wneu.2015.06.030
20. Radaelli S, Stacchiotti S, Ruggieri P, et al. Sacral Chordoma: Long-term Outcome of a Large Series of Patients Surgically Treated at Two Reference Centers. *Spine.* 2016;41(12):1049-1057. doi:10.1097/BRS.0000000000001604
21. Xie C, Whalley N, Adasonla K, Grimer R, Jeys L. Can local recurrence of a sacral chordoma be treated by further surgery? *Bone Jt J.* 2015;97-B(5):711-715. doi:10.1302/0301-620X.97B5.35131
22. Bergh P, Kindblom LG, Gunterberg B, Remotti F, Ryd W, Meis-Kindblom JM. Prognostic factors in chordoma of the sacrum and mobile spine: a study of 39 patients. *Cancer.* 2000;88(9):2122-2134.
23. Wittekind C, Compton C, Quirke P, et al. A uniform residual tumor (R) classification. *Cancer.* 2009;115(15):3483-3488. doi:10.1002/cncr.24320
24. Dubory A, Missenard G, Lambert B, Court C. Interest of Laparoscopy for “En Bloc” Resection of Primary Malignant Sacral Tumors by Combined Approach: Comparative Study With Open Median Laparotomy. *Spine.* 2015;40(19):1542-1552. doi:10.1097/BRS.0000000000001069
25. Fuchs B, Dickey ID, Yaszemski MJ, Inwards CY, Sim FH. Operative management of sacral chordoma. *J Bone Joint Surg Am.* 2005;87(10):2211-2216. doi:10.2106/JBJS.D.02693
26. Randall RL, Bruckner J, Lloyd C, Pohlman TH, Conrad EU. Sacral resection and reconstruction for tumors and tumor-like conditions. *Orthopedics.* 2005;28(3):307-313.
27. Makhdoomi R, Ramzan A, Khurshid N, et al. Clinicopathological characteristics of chordoma: an institutional experience and a review of the literature. *Turk Neurosurg.* 2013;23(6):700-706. doi:10.5137/1019-5149.JTN.5941-12.3
28. Park L, Delaney TF, Liebsch NJ, et al. Sacral chordomas: Impact of high-dose proton/photon-beam radiation therapy combined with or without surgery for primary versus recurrent tumor. *Int J Radiat Oncol Biol Phys.* 2006;65(5):1514-1521. doi:10.1016/j.ijrobp.2006.02.059
29. Schoenthaler R, Castro JR, Petti PL, Baken-Brown K, Phillips TL. Charged particle irradiation of sacral chordomas. *Int J Radiat Oncol Biol Phys.* 1993;26(2):291-298.
30. Zabel-du Bois A, Nikoghosyan A, Schwahofer A, et al. Intensity modulated radiotherapy in the management of sacral chordoma in primary versus recurrent disease. *Radiother Oncol J Eur Soc Ther Radiol Oncol.* 2010;97(3):408-412. doi:10.1016/j.radonc.2010.10.008
31. Böhm B, Milsom JW, Fazio VW, Lavery IC, Church JM, Oakley JR. Our approach to the management of congenital presacral tumors in adults. *Int J Colorectal Dis.* 1993;8(3):134-138.
32. Furlani S, Cagol P, Zanella A, Lise M. Sacrococcygeal chordoma. *Surg Italy.* 1980;10(4):290-297.
33. Li X, Wang S, Chen Y, Liu G, Yang X. Overexpression of CD40 in sacral chordomas and its correlation with low tumor recurrence. *Onkologie.* 2013;36(10):567-571. doi:10.1159/000355334

34. Aguiar Júnior S, Andrade WP, Baiocchi G, et al. Natural history and surgical treatment of chordoma: a retrospective cohort study. *Sao Paulo Med J*. 2014;132(5):297-302. doi:10.1590/1516-3180.2014.1325628
35. Ahmed AR. Safety margins in resection of sacral chordoma: analysis of 18 patients. *Arch Orthop Trauma Surg*. 2009;129(4):483-487. doi:10.1007/s00402-008-0674-y
36. Asavamongkolkul A, Waikakul S. Wide resection of sacral chordoma via a posterior approach. *Int Orthop*. 2012;36(3):607-612. doi:10.1007/s00264-011-1381-9
37. Atalar H, Selek H, Yildiz Y, Sağlık Y. Management of sacrococcygeal chordomas. *Int Orthop*. 2006;30(6):514-518. doi:10.1007/s00264-006-0095-x
38. Chen KW, Yang HL, Lu J, Liu JY, Chen XQ. Prognostic factors of sacral chordoma after surgical therapy: a study of 36 patients. *Spinal Cord*. 2010;48(2):166-171. doi:10.1038/sc.2009.95
39. Chung Rong C, Hsu C-H, Chen JS, Wang J-Y. Sacrococcygeal chordoma. *Asian J Surg*. 1996;29(2):152-156.
40. Clarke MJ, Dasenbrock H, Bydon A, et al. Posterior-only approach for en bloc sacrectomy: clinical outcomes in 36 consecutive patients. *Neurosurgery*. 2012;71(2):357-364; discussion 364. doi:10.1227/NEU.0b013e31825d01d4
41. Eid AS, Chang U-K, Lee S-Y, Jeon D-G. The treatment outcome depending on the extent of resection in skull base and spinal chordomas. *Acta Neurochir (Wien)*. 2011;153(3):509-516. doi:10.1007/s00701-010-0928-7
42. Froehlich EV, Scheipl S, Lazary A, et al. Expression of ezrin, MMP-9, and COX-2 in 50 chordoma specimens: a clinical and immunohistochemical analysis. *Spine*. 2012;37(13):E757-767. doi:10.1097/BRS.0b013e31824782e1
43. Housari G, González M, Calero P, Beni R, Lobo E. Sacral chordoma: management of a rare disease in a tertiary hospital. *Clin Transl Oncol Off Publ Fed Span Oncol Soc Natl Cancer Inst Mex*. 2013;15(4):327-330. doi:10.1007/s12094-012-0919-7
44. Moojen W, Vleggeert-Lankamp C, Krol A, Dijkstra S. Long-term results: adjuvant radiotherapy in en bloc resection of sacrococcygeal chordoma is advisable. *Spine*. 36(10):E656-661.
45. Osaka S, Osaka E, Kojima T, Yoshida Y, Tokuhashi Y. Long-term outcome following surgical treatment of sacral chordoma. *J Surg Oncol*. 2014;109(3):184-188. doi:10.1002/jso.23490
46. Ozaki T, Hillmann A, Winkelmann W. Surgical Treatment of sacrococcygeal chordoma. *J Surg Oncol*. 1997;64(4):274-279.
47. Prabhakaran PS, Misra S, Kannan V, et al. Sacral chordomas: a 10-year study. *Australas Radiol*. 1998;42(1):42-46.
48. Puri A, Agarwal MG, Shah M, et al. Decision making in primary sacral tumors. *Spine J Off J North Am Spine Soc*. 2009;9(5):396-403. doi:10.1016/j.spinee.2008.10.001
49. Schwab JH, Healey JH, Rose P, Casas-Ganem J, Boland PJ. The surgical management of sacral chordomas. *Spine*. 2009;34(24):2700-2704. doi:10.1097/BRS.0b013e3181bad11d
50. Thieblemont C, Biron P, Rocher F, et al. Prognostic factors in chordoma: role of postoperative radiotherapy. *Eur J Cancer Oxf Engl*. 1995;31A(13-14):2255-2259.
51. Waisman M, Kligman M, Roffman M. Posterior approach for radical excision of sacral chordoma. *Int Orthop*. 1997;21(3):181-184.



52. Xue-Song L, Chao Y, Kai-Yong Y, Si-Qing H, Heng Z. Surgical excision of extensive sacrococcygeal chordomas assisted by occlusion of the abdominal aorta. *J Neurosurg Spine*. 2010;12(5):490-496. doi:10.3171/2009.11.SPINE0977
53. Yang Y-K, Chan C-M, Zhang Q, Xu H-R, Niu X-H. Computer Navigation-aided Resection of Sacral Chordomas. *Chin Med J (Engl)*. 2016;129(2):162-168. doi:10.4103/0366-6999.173465
54. York JE, Kaczaraj A, Abi-Said D, et al. Sacral chordoma: 40-year experience at a major cancer center. *Neurosurgery*. 1999;44(1):74-79-80.
55. Localio SA, Eng K, Ranson JH. Abdominosacral approach for retrorectal tumors. *Ann Surg*. 1980;191(5):555-560.
56. Gennari L, Azzarelli A, Quagliuolo V. A posterior approach for the excision of sacral chordoma. *J Bone Joint Surg Br*. 1987;69(4):565-568.
57. Hanna SA, Aston WJS, Briggs TWR, Cannon SR, Saifuddin A. Sacral chordoma: can local recurrence after sacrectomy be predicted? *Clin Orthop*. 2008;466(9):2217-2223. doi:10.1007/s11999-008-0356-7
58. Demirkiran G, Dede O, Karadeniz E, Olgun D, Ayvaz M, Yazici M. Anterior and Posterior Vertebral Column Resection Versus Posterior-only Technique: A Comparison of Clinical Outcomes and Complications in Congenital Kyphoscoliosis. *Clin Spine Surg*. 2017;30(7):285-290. doi:10.1097/BSD.0000000000000348
59. Ruggieri P, Angelini A, Ussia G, Montalti M, Mercuri M. Surgical margins and local control in resection of sacral chordomas. *Clin Orthop*. 2010;468(11):2939-2947. doi:10.1007/s11999-010-1472-8
60. Varga PP, Szövérfi Z, Fisher CG, et al. Surgical treatment of sacral chordoma: prognostic variables for local recurrence and overall survival. *Eur Spine J Off Publ Eur Spine Soc Eur Spinal Deform Soc Eur Sect Cerv Spine Res Soc*. 2015;24(5):1092-1101. doi:10.1007/s00586-014-3728-6
61. Cheng EY, Ozerdemoglu RA, Transfeldt EE, Thompson RC. Lumbosacral chordoma. Prognostic factors and treatment. *Spine*. 1999;24(16):1639-1645.
62. Hulen CA, Temple HT, Fox WP, Sama AA, Green BA, Eismont FJ. Oncologic and functional outcome following sacrectomy for sacral chordoma. *J Bone Joint Surg Am*. 2006;88(7):1532-1539. doi:10.2106/JBJS.D.02533
63. van Wulfften Palthe ODR, Houdek MT, Rose PS, et al. How Does the Level of Nerve Root Resection in En Bloc Sacrectomy Influence Patient-Reported Outcomes? *Clin Orthop*. March 2016. doi:10.1007/s11999-016-4794-3
64. Guo Y, Palmer JL, Shen L, et al. Bowel and bladder continence, wound healing, and functional outcomes in patients who underwent sacrectomy. *J Neurosurg Spine*. 2005;3(2):106-110. doi:10.3171/spi.2005.3.2.0106
65. Andreoli F, Balloni F, Bigiotti A, et al. Anorectal continence and bladder function. Effects of major sacral resection. *Dis Colon Rectum*. 1986;29(10):647-652.
66. Rotondo RL, Folkert W, Liebsch NJ, et al. High-dose proton-based radiation therapy in the management of spine chordomas: outcomes and clinicopathological prognostic factors. *J Neurosurg Spine*. 2015;23(6):788-797. doi:10.3171/2015.3.SPINE14716
67. Stacchiotti S, Longhi A, Ferraresi V, et al. Phase II Study of Imatinib in Advanced Chordoma. *J Clin Oncol*. 2012;30(9):914-920. doi:10.1200/JCO.2011.35.3656

68. Hindi N, Casali PG, Morosi C, et al. Imatinib in advanced chordoma: A retrospective case series analysis. *Eur J Cancer Oxf Engl 1990*. 2015;51(17):2609-2614. doi:10.1016/j.ejca.2015.07.038
69. Dhawale AA, Gjolaj JP, Holmes L, Sands LR, Temple HT, Eismont FJ. Sacrectomy and adjuvant radiotherapy for the treatment of sacral chordomas: a single-center experience over 27 years. *Spine*. 2014;39(5):E353-359. doi:10.1097/BRS.000000000000173
70. Bettgowda C, Yip S, Lo S-FL, et al. Spinal column chordoma: prognostic significance of clinical variables and T (brachyury) gene SNP rs2305089 for local recurrence and overall survival. *Neuro-Oncol*. September 2016. doi:10.1093/neuonc/now156
71. Ailon T, Torabi R, Fisher CG, et al. Management of Locally Recurrent Chordoma of the Mobile Spine and Sacrum: A Systematic Review. *Spine*. 2016;41 Suppl 20:S193-S198. doi:10.1097/BRS.0000000000001812
72. Ahmed R, Sheybani A, Menezes AH, Buatti JM, Hitchon PW. Disease outcomes for skull base and spinal chordomas: a single center experience. *Clin Neurol Neurosurg*. 2015;130:67-73. doi:10.1016/j.clineuro.2014.12.015
73. Arıkan M, Togrul G, Hastürk AE, Aktaş E, Güngör S. Management and retrospective analysis of primary and metastatic sacral tumors and infections: evaluation with 73 cases. *Eklem Hastalık Ve Cerrahisi Jt Dis Relat Surg*. 2014;25(3):126-132.
74. Garofalo F, Christoforidis D, di Summa PG, et al. The unresolved case of sacral chordoma: from misdiagnosis to challenging surgery and medical therapy resistance. *Ann Coloproctology*. 2014;30(3):122-131. doi:10.3393/ac.2014.30.3.122
75. Huth JF, Dawson EG, Eilber FR. Abdominosacral resection for malignant tumors of the sacrum. *Am J Surg*. 1984;148(1):157-161.
76. Ishii K, Chiba K, Watanabe M, Yabe H, Fujimura Y, Toyama Y. Local recurrence after S2-3 sacrectomy in sacral chordoma. Report of four cases. *J Neurosurg*. 2002;97(1 Suppl):98-101.
77. Jao SW, Beart RW, Spencer RJ, Reiman HM, Ilstrup DM. Retrorectal tumors. Mayo Clinic experience, 1960-1979. *Dis Colon Rectum*. 1985;28(9):644-652.
78. Ozger H, Eralp L, Sungur M, Atalar AC. Surgical management of sacral chordoma. *Acta Orthop Belg*. 2010;76(2):243-253.
79. Ruosi C, Colella G, Di Donato SL, Granata F, Di Salvatore MG, Fazioli F. Surgical treatment of sacral chordoma: survival and prognostic factors. *Eur Spine J Off Publ Eur Spine Soc Eur Spinal Deform Soc Eur Sect Cerv Spine Res Soc*. 2015;24 Suppl 7:912-917. doi:10.1007/s00586-015-4276-4
80. Sahakitrungruang C, Chantra K, Dusitanond N, Atittharnsakul P, Rojanasakul A. Sacrectomy for primary sacral tumors. *Dis Colon Rectum*. 2009;52(5):913-918. doi:10.1007/DCR.0b013e3181a0d932
81. Simpson AH, Porter A, Davis A, Griffin A, McLeod RS, Bell RS. Cephalad sacral resection with a combined extended ilioinguinal and posterior approach. *J Bone Joint Surg Am*. 1995;77(3):405-411.
82. Sundaresan N, Huvos AG, Krol G, Lane JM, Brennan M. Surgical treatment of spinal chordomas. *Arch Surg Chic Ill 1960*. 1987;122(12):1479-1482.
83. Wong KC, Kumta SM. Computer-assisted tumor surgery in malignant bone tumors. *Clin Orthop*. 2013;471(3):750-761. doi:10.1007/s11999-012-2557-3
84. Wuisman P, Lieshout O, Sugihara S, van Dijk M. Total sacrectomy and reconstruction: oncologic and functional outcome. *Clin Orthop*. 2000;(381):192-203.

85. Xu WP, Song XW, Yue SY, Cai YB, Wu J. Primary sacral tumors and their surgical treatment. A report of 87 cases. *Chin Med J (Engl)*. 1990;103(11):879-884.
86. Yonemoto T, Tatzaki S, Takenouchi T, Ishii T, Satoh T, Moriya H. The surgical management of sacrococcygeal chordoma. *Cancer*. 1999;85(4):878-883.
87. Zaaroor M, Sviri GE. Surgical management of huge sacral chordoma. Proceedings of the 13th World Congress of Neurological Surgery:179-183.
